# Supplementary material for: hsa-miR-548v controls the viscoelastic properties of human cardiomyocytes and improves their relaxation rates
Source: JCI Insight. 2024 Jan 2;9(3):e161356. doi: 10.1172/jci.insight.161356 (PMC11143964; doi:10.1172/jci.insight.161356)
Supplement: Supplemental tables 1-3 [file jciinsight-9-161356-s009.pdf]

|             |                                                  |                |                       |      |             |             |          |        |        |
|-------------|--------------------------------------------------|----------------|-----------------------|------|-------------|-------------|----------|--------|--------|
| FSCN2       | fascin actin-bundling protein 2, retinal         | protein_coding | chr17:81528396-8      | 2019 | 1.138826639 | 1.505755108 | 0.341965 | 0.0123 | 0.0171 |
| AC034236.2  | novel transcript, antisense to COMMD10           | lncRNA         | chr5:116083807-1      | 1610 | 0.893449245 | 1.238901974 | 0.378504 | 0.0126 | 0.0175 |
| AC003102.1  | novel transcript, antisense to UBTF              | lncRNA         | chr17:44221401-4      | 2012 | 1.607596791 | 2.093405786 | 0.305644 | 0.013  | 0.0181 |
| AC139100.2  | novel transcript                                 | lncRNA         | chr18:80161752-8      | 662  | 0.640286366 | 1.086122346 | 0.62495  | 0.0131 | 0.0182 |
| SLC25A5-AS1 | SLC25A5 antisense RNA 1                          | lncRNA         | chrX:119465986-1      | 3143 | 0.796909503 | 1.062022761 | 0.372068 | 0.0133 | 0.0185 |
| AC026801.2  | novel transcript, antisense to TTC23L            | lncRNA         | chr5:34837549-34      | 1565 | 0.64274359  | 0.948500211 | 0.470969 | 0.0133 | 0.0185 |
| LINC02019   | long intergenic non-protein coding RNA 2         | lncRNA         | chr3:50669989-50 2060 |      | 0.714288059 | 0.992331431 | 0.395192 | 0.0137 | 0.019  |
| SLC9A3R1    | SLC9A3 regulator 1                               | protein_coding | chr17:74748628-7      | 2339 | 0.81126113  | 1.069208616 | 0.308593 | 0.014  | 0.0194 |
| AC015922.3  | novel transcript                                 | lncRNA         | chr17:15789016-1      | 690  | 2.418108448 | 3.361571976 | 0.38876  | 0.0143 | 0.0198 |
| CCR10       | C-C motif chemokine receptor 10                  | protein_coding | chr17:42678889-4      | 2619 | 0.822937697 | 1.069389014 | 0.299075 | 0.0144 | 0.0198 |
| TRAPPC2B    | trafficking protein particle complex 2B          | protein_coding | chr19:57363511-5      | 1843 | 0.876043114 | 1.176246069 | 0.332941 | 0.0145 | 0.0201 |
| NAL1        | NOTCH1 associated lncRNA in T cell acute         | lncRNA         | chr9:136546212-1      | 1088 | 2.644492027 | 3.515321049 | 0.313624 | 0.0146 | 0.0201 |
| PAN3-AS1    | PAN3 antisense RNA 1                             | lncRNA         | chr13:28136843-2      | 1351 | 1.373733151 | 1.798303469 | 0.313805 | 0.0146 | 0.0201 |
| AP001816.1  | novel transcript                                 | lncRNA         | chr4:101347780-1      | 790  | 1.170836594 | 1.737353773 | 0.470576 | 0.0151 | 0.0208 |
| AC138207.2  | novel transcript, antisense to NF1               | lncRNA         | chr17:31090787-3      | 492  | 1.658863761 | 2.522395891 | 0.499795 | 0.0155 | 0.0214 |
| AC093627.2  | novel transcript                                 | lncRNA         | chr7:174920-1760      | 568  | 0.525455991 | 0.88506159  | 0.678324 | 0.0157 | 0.0216 |
| AP000926.2  | novel transcript, antisense to HSPA8 and C       | lncRNA         | chr11:123062655-      | 724  | 0.597968601 | 0.940402865 | 0.629134 | 0.0158 | 0.0217 |
| AC139149.1  | novel transcript, antisense to ACTG1             | lncRNA         | chr17:81514047-8      | 957  | 1.160928898 | 1.71696563  | 0.466    | 0.0158 | 0.0217 |
| DUSP13      | dual specificity phosphatase 13                  | protein_coding | chr10:75094432-7      | 2351 | 0.989530502 | 1.276417273 | 0.279634 | 0.0159 | 0.0218 |
| AP001453.1  | novel transcript                                 | lncRNA         | chr11:64229214-6      | 1051 | 0.750518698 | 1.1647023   | 0.580972 | 0.0159 | 0.0218 |
| AC083799.1  | novel transcript, sense intronic to TMCC1        | lncRNA         | chr3:129847048-1      | 910  | 1.863158545 | 2.432212348 | 0.298457 | 0.0162 | 0.0222 |
| AC080023.1  | novel transcript                                 | lncRNA         | chr11:10302657-1      | 803  | 1.039487852 | 1.563845891 | 0.537304 | 0.0163 | 0.0223 |
| AL356489.2  | novel transcript                                 | lncRNA         | chr9:33697459-33      | 3528 | 1.421308867 | 1.844540711 | 0.291426 | 0.0167 | 0.0229 |
| AC005759.2  | novel transcript, antisense to PDE4C             | lncRNA         | chr19:18204730-1      | 1212 | 0.686474962 | 1.072386441 | 0.530305 | 0.018  | 0.0244 |
| AL356512.1  | novel transcript, antisense to EFCAB2            | lncRNA         | chr1:244969350-2      | 1739 | 0.966374881 | 1.306134358 | 0.336708 | 0.0182 | 0.0247 |
| AC138150.1  | novel transcript, antisense to HEXIM1 and        | lncRNA         | chr17:45150400-4      | 696  | 1.950578175 | 2.673938829 | 0.357436 | 0.0184 | 0.025  |
| C1orf229    | chromosome 1 open reading frame 229              | lncRNA         | chr1:247110160-2      | 2258 | 0.923243315 | 1.201030921 | 0.28748  | 0.019  | 0.0257 |
| AC010809.1  | novel transcript, antisense to RYR3              | lncRNA         | chr15:33858602-3      | 562  | 0.830714555 | 1.233554997 | 0.487441 | 0.0201 | 0.0271 |
| AC068279.2  | novel transcript                                 | lncRNA         | chr2:87311460-87      | 1417 | 1.03641179  | 1.385738317 | 0.325533 | 0.0202 | 0.0273 |
| SLC35D2     | solute carrier family 35 member D2               | protein_coding | chr9:96313444-96      | 3827 | 1.325715219 | 1.729417937 | 0.279887 | 0.0206 | 0.0277 |
| AL117336.2  | novel transcript, antisense to CCNY              | lncRNA         | chr10:35314552-3      | 1426 | 1.986420775 | 2.540109193 | 0.270396 | 0.0208 | 0.0281 |
| AC026304.1  | novel transcript                                 | lncRNA         | chr3:143000907-1      | 561  | 1.081867363 | 1.633643476 | 0.533676 | 0.0211 | 0.0284 |
| RAB20       | RAB20, member RAS oncogene family                | protein_coding | chr13:110523066-      | 1507 | 1.881598154 | 2.434781987 | 0.28267  | 0.0213 | 0.0286 |
| FO393418.1  | novel transcript                                 | lncRNA         | chr22:36388626-3      | 510  | 1.355707953 | 2.107237222 | 0.588198 | 0.0219 | 0.0294 |
| AL133520.1  | novel transcript, sense intronic to SLC13A1      | lncRNA         | chr20:46681676-4      | 700  | 0.629938415 | 0.93873053  | 0.500851 | 0.022  | 0.0295 |
| AC012442.2  | novel transcript                                 | lncRNA         | chr2:112589040-1      | 425  | 0.599138077 | 0.991225939 | 0.581792 | 0.022  | 0.0295 |
| HIST1H4K    | histone cluster 1 H4 family member k             | protein_coding | chr6:27831216-27      | 312  | 0.670963645 | 1.136292914 | 0.802412 | 0.0238 | 0.0318 |
| AC145207.1  | novel transcript                                 | lncRNA         | chr17:81941869-8      | 691  | 1.298639499 | 1.878518149 | 0.44675  | 0.0242 | 0.0323 |
| AP000894.4  | novel transcript                                 | lncRNA         | chr18:813274-813      | 483  | 0.759165091 | 1.249337682 | 0.593253 | 0.0246 | 0.0328 |
| AC011481.1  | novel transcript                                 | lncRNA         | chr19:44950044-4      | 361  | 0.980607779 | 1.72079137  | 0.785699 | 0.0249 | 0.0332 |
| AL442125.2  | novel transcript, sense intronic                 | lncRNA         | chr13:113511747-      | 418  | 0.709348474 | 1.191004849 | 0.679362 | 0.0252 | 0.0336 |
| AL355987.4  | novel transcript                                 | lncRNA         | chr9:136799223-1      | 4335 | 0.859779187 | 1.124085001 | 0.31098  | 0.0257 | 0.0342 |
| AP000255.1  | novel transcript                                 | lncRNA         | chr21:31735732-3      | 676  | 0.368346092 | 0.688895767 | 0.750558 | 0.0262 | 0.0348 |
| AC008393.1  | novel transcript                                 | lncRNA         | chr5:179859013-1      | 1454 | 1.206208495 | 1.583935379 | 0.314537 | 0.0264 | 0.035  |
| HPDL        | 4-hydroxyphenylpyruvate dioxygenase like protein | protein_coding | chr1:45326905-45      | 1629 | 0.96720733  | 1.3226979   | 0.398116 | 0.0264 | 0.035  |
| AC010531.1  | novel transcript, antisense to FBXO31 and        | lncRNA         | chr16:87317509-8      | 401  | 0.808343937 | 1.309761313 | 0.614887 | 0.0267 | 0.0353 |
| PCF11-AS1   | PCF11 antisense RNA 1                            | lncRNA         | chr11:83185521-8      | 1516 | 1.345011084 | 1.771935994 | 0.319555 | 0.0281 | 0.0371 |
| AC138932.5  | novel transcript, antisense to PDXDC1            | lncRNA         | chr16:15015828-1      | 563  | 0.781102935 | 1.185095219 | 0.486448 | 0.0282 | 0.0372 |
| LINC01311   | long intergenic non-protein coding RNA 1         | lncRNA         | chr22:19171395-1      | 1445 | 0.813162476 | 1.083414874 | 0.316754 | 0.0289 | 0.0381 |
| AL627309.2  | novel transcript                                 | lncRNA         | chr1:139790-1403      | 323  | 0.496185805 | 0.925311393 | 1.000288 | 0.0291 | 0.0383 |
| LINC02315   | long intergenic non-protein coding RNA 2         | lncRNA         | chr14:40954693-4      | 1136 | 1.508702981 | 1.972294433 | 0.284097 | 0.0291 | 0.0383 |
| ATP2A1-AS1  | ATP2A1 antisense RNA 1                           | lncRNA         | chr16:28878957-2      | 583  | 1.969962604 | 2.76499046  | 0.403377 | 0.0291 | 0.0384 |
| PRRT3-AS1   | PRRT3 antisense RNA 1                            | lncRNA         | chr3:9947404-995      | 614  | 0.586534722 | 0.981749471 | 0.824548 | 0.0298 | 0.0392 |
| AC004908.2  | novel transcript, sense intronic to ZNF591       | lncRNA         | chr8:233119-2336      | 574  | 1.602787923 | 2.170427639 | 0.375963 | 0.0305 | 0.0401 |
| AC010809.2  | novel transcript, antisense to RYR3              | lncRNA         | chr15:33851785-3      | 964  | 0.591195894 | 0.867092718 | 0.465914 | 0.0306 | 0.0402 |
| AC005391.1  | novel transcript, sense intronic to ARID3A       | lncRNA         | chr19:956485-958      | 341  | 0.632367354 | 1.028359199 | 0.673045 | 0.0307 | 0.0403 |
| SLC25A41    | solute carrier family 25 member 41               | protein_coding | chr19:6426037-64      | 1649 | 0.835774613 | 1.083327567 | 0.282189 | 0.0329 | 0.043  |
| AL355999.1  | novel transcript, antisense to DHX9              | lncRNA         | chr1:182837185-1      | 1000 | 0.807911219 | 1.112803284 | 0.363169 | 0.0335 | 0.0437 |
| AC106820.5  | novel transcript                                 | lncRNA         | chr16:2456252-24      | 879  | 0.517264801 | 0.86095786  | 0.559118 | 0.0349 | 0.0454 |
| HK2         | hexokinase 2                                     | protein_coding | chr2:74833981-74      | 6064 | 9.887346244 | 12.67050609 | 0.265582 | 0.0349 | 0.0455 |
| AC008610.1  | novel transcript                                 | lncRNA         | chr5:180293245-1      | 393  | 1.503191936 | 2.178338486 | 0.450546 | 0.0351 | 0.0457 |
| AP005205.2  | novel transcript, antisense to ARHGAP28          | lncRNA         | chr18:6728821-67      | 491  | 0.452378422 | 0.802679655 | 0.97301  | 0.0356 | 0.0464 |
| LINC01004   | long intergenic non-protein coding RNA 1         | lncRNA         | chr7:104950315-1      | 1483 | 1.278979541 | 1.680630235 | 0.319007 | 0.0357 | 0.0465 |
| AC092574.1  | novel transcript                                 | lncRNA         | chr4:416118-4165      | 420  | 0.684099625 | 1.077840304 | 0.583156 | 0.0376 | 0.0487 |
| LINC01909   | long intergenic non-protein coding RNA 1         | lncRNA         | chr18:70335439-7 1040 |      | 0.717788294 | 1.004091124 | 0.407324 | 0.0376 | 0.0488 |
| BST2        | bone marrow stromal cell antigen 2               | protein_coding | chr19:17402939-1      | 1101 | 0.944388732 | 1.274188712 | 0.348676 | 0.0377 | 0.0488 |
| LINC00653   | long intergenic non-protein coding RNA 6         | lncRNA         | chr20:18794529-1      | 1539 | 0.884557791 | 1.146958319 | 0.29859  | 0.0381 | 0.0493 |
| AF131215.7  | novel transcript                                 | lncRNA         | chr8:11202965-11      | 707  | 0.653686577 | 1.006689071 | 0.576936 | 0.0381 | 0.0493 |



























































|              |                                               |                |                 |      |             |             |        |          |          |
|--------------|-----------------------------------------------|----------------|-----------------|------|-------------|-------------|--------|----------|----------|
| AL353194.1   | novel transcript                              | lncRNA         | chr20:3888239-  | 441  | 2.625842804 | 2.062307976 | -0.447 | 1.18E-02 | 1.64E-02 |
| LINC01290    | long intergenic non-protein coding RNA 1      | lncRNA         | chr16:10514842  | 502  | 1.084951477 | 0.766587762 | -0.596 | 1.20E-02 | 1.67E-02 |
| ADNP-AS1     | ADNP antisense RNA 1                          | lncRNA         | chr20:50930984  | 1049 | 1.149624828 | 0.91588324  | -0.447 | 1.39E-02 | 1.92E-02 |
| AC139530.4   | novel transcript, antisense to HGS            | lncRNA         | chr17:81697025  | 690  | 0.952105202 | 0.656517966 | -0.605 | 1.39E-02 | 1.92E-02 |
| CTH          | cystathionine gamma-lyase                     | protein_coding | chr1:70411218-  | 2414 | 1.162364137 | 1.020942426 | -0.282 | 1.39E-02 | 1.93E-02 |
| AL118558.3   | novel transcript                              | lncRNA         | chr14:10194834  | 1079 | 3.830233004 | 3.101804906 | -0.37  | 1.48E-02 | 2.05E-02 |
| AC005277.1   | novel transcript, antisense to ARHGAP44       | lncRNA         | chr17:12990145  | 335  | 0.590992534 | 0.243353308 | -1.324 | 1.62E-02 | 2.21E-02 |
| C10orf71-AS1 | C10orf71 antisense RNA 1                      | lncRNA         | chr10:49296112  | 963  | 2.885462452 | 2.208583981 | -0.449 | 1.67E-02 | 2.28E-02 |
| AC099568.2   | novel transcript                              | lncRNA         | chr1:89820174-  | 695  | 0.993063807 | 0.726804216 | -0.553 | 1.68E-02 | 2.29E-02 |
| FAM110A      | family with sequence similarity 110 member    | protein_coding | chr20:833715-8  | 2722 | 1.642079769 | 1.447885206 | -0.274 | 1.69E-02 | 2.31E-02 |
| LINC02248    | long intergenic non-protein coding RNA 2      | lncRNA         | chr15:26395033  | 2804 | 1.051555258 | 0.887382719 | -0.319 | 1.73E-02 | 2.36E-02 |
| CACNA1C-IT2  | CACNA1C intronic transcript 2                 | lncRNA         | chr12:2048352-  | 589  | 1.936015858 | 1.394781188 | -0.563 | 1.96E-02 | 2.65E-02 |
| MED30        | mediator complex subunit 30                   | protein_coding | chr8:117520713  | 1440 | 2.619002791 | 2.330710209 | -0.271 | 1.99E-02 | 2.69E-02 |
| AC100793.2   | novel transcript, antisense to CCR10          | lncRNA         | chr17:42679963  | 542  | 2.498548549 | 1.93675152  | -0.493 | 2.04E-02 | 2.75E-02 |
| HYAL3        | hyaluronidase 3                               | protein_coding | chr3:50292831-  | 1967 | 1.094534561 | 0.879747951 | -0.419 | 2.22E-02 | 2.99E-02 |
| AP000350.5   | novel transcript, antisense to SLC2A11        | lncRNA         | chr22:23856427  | 613  | 1.023079635 | 0.796743612 | -0.433 | 2.24E-02 | 3.01E-02 |
| AC115618.1   | novel transcript, antisense to RBM3           | lncRNA         | chrX:48568014-  | 549  | 1.002203039 | 0.717988098 | -0.549 | 2.25E-02 | 3.02E-02 |
| AC040934.1   | novel transcript                              | lncRNA         | chr17:47409322  | 513  | 1.036571902 | 0.798465581 | -0.454 | 2.28E-02 | 3.06E-02 |
| AC106782.2   | novel transcript                              | lncRNA         | chr16:30355441  | 992  | 1.032605575 | 0.817711733 | -0.417 | 2.34E-02 | 3.13E-02 |
| LGALS1       | galectin 1                                    | protein_coding | chr22:37675636  | 1067 | 3.283907815 | 2.782613407 | -0.31  | 2.45E-02 | 3.27E-02 |
| GFOD1-AS1    | GFOD1 antisense RNA 1                         | lncRNA         | chr6:13486294-  | 332  | 0.810847995 | 0.498348662 | -0.692 | 2.71E-02 | 3.58E-02 |
| ITM2A        | integral membrane protein 2A                  | protein_coding | chrX:79360384-  | 2051 | 1.367513949 | 1.203791579 | -0.266 | 2.77E-02 | 3.66E-02 |
| HES7         | hes family bHLH transcription factor 7        | protein_coding | chr17:8120592-  | 1880 | 1.044618038 | 0.875231075 | -0.33  | 2.84E-02 | 3.75E-02 |
| AP005482.3   | novel transcript, sense intronic CEP76        | lncRNA         | chr18:12670426  | 720  | 1.495756467 | 1.178406426 | -0.409 | 3.05E-02 | 4.00E-02 |
| AL596094.1   | novel transcript                              | lncRNA         | chr10:5813985-  | 276  | 1.509940226 | 1.113495285 | -0.51  | 3.09E-02 | 4.06E-02 |
| AC005342.1   | novel transcript                              | lncRNA         | chr12:20046666- | 629  | 1.788630858 | 1.367027181 | -0.431 | 3.19E-02 | 4.18E-02 |
| BEND5        | BEN domain containing 5                       | protein_coding | chr1:48727519-  | 2142 | 1.178630909 | 1.023555788 | -0.29  | 3.21E-02 | 4.20E-02 |
| MTRNR2L10    | MT-RNR2 like 10                               | protein_coding | chrX:55181391-  | 1530 | 1.969376061 | 1.643434164 | -0.318 | 3.22E-02 | 4.21E-02 |
| AC117402.1   | novel transcript                              | lncRNA         | chr3:110888384  | 1363 | 0.907903676 | 0.707359942 | -0.408 | 3.36E-02 | 4.39E-02 |
| AC009309.1   | novel transcript, antisense to IMMT           | lncRNA         | chr2:86195590-  | 460  | 3.564570801 | 3.031529514 | -0.31  | 3.38E-02 | 4.41E-02 |
| AC005288.1   | novel transcript, antisense to MED1 & FBX     | lncRNA         | chr17:39401795  | 1053 | 1.412803618 | 1.166262322 | -0.361 | 3.46E-02 | 4.51E-02 |
| FMC1         | formation of mitochondrial complex V assembly | protein_coding | chr7:139339457  | 1328 | 1.037642614 | 0.872086986 | -0.331 | 3.49E-02 | 4.54E-02 |
| MTRNR2L12    | MT-RNR2 like 12                               | protein_coding | chr3:96617188-  | 1049 | 12.16922117 | 10.45592193 | -0.268 | 3.49E-02 | 4.54E-02 |
| AC018648.1   | novel transcript                              | lncRNA         | chr7:32845394-  | 668  | 0.730245936 | 0.478446879 | -0.634 | 3.80E-02 | 4.93E-02 |

**Supplemental Table 3: List of oligonucleotides used for CRISPR-Cas9 experiments**

| Nomenclature used in this paper | Sequence                                                                                                                                        |
|---------------------------------|-------------------------------------------------------------------------------------------------------------------------------------------------|
| sgRNA BRAF                      | TCGAGATTTCACTGTAGCTA                                                                                                                            |
| ssODN T599R                     | GGGCCAAAAATTTAATCAGTGGAAAAATAGCCTCAATTCTTACCAT<br>CCACAAAATGGATCCAGACAACTGTTCAAAGTATGGGACCCACTCC<br><u>ATCGAGATTTCACTCTGCTAGACCAAAATCACCTAT</u> |
| Fwd-BRAF                        | CCTAACACATTTCAAGCCCCA                                                                                                                           |
| Rev-BRAF                        | AACTCAGCAGCATCTCAGGG                                                                                                                            |
